# Supplementary material
Source: publisher figshare collection journal article supplement (https://adisjournals.figshare.com/articles/dataset/_/23500908)
Supplement: Supplementary file 2 [file 2]

# The Clinical Value of Decitabine Monotherapy in Patients with Acute Myeloid Leukemia

V. Santini, M. Lübbert, A. Wierzbowska, G. J. Ossenkoppele

**Decitabine** (5-aza-2'-deoxy-cytidine) is a hypomethylating agent used to treat **acute myeloid leukemia (AML)**

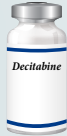

Decitabine is indicated in the EU for adult patients with newly diagnosed **de novo** or **secondary AML** who are **not** eligible for standard induction chemotherapy

*Clinical and real-world data suggest that decitabine is safe and effective in this at-risk population*

### • DACO-016 clinical trial •

This phase III registration trial examined the effects of decitabine in older patients

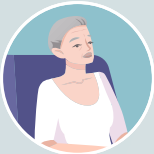

Treatment group receiving decitabine

485 patients

Aged 65 or older

Newly diagnosed or secondary AML

Not eligible for standard chemotherapy

1-hour infusion daily for five consecutive days every 4 weeks

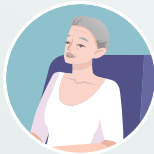

Control group receiving cytarabine or supportive care alone

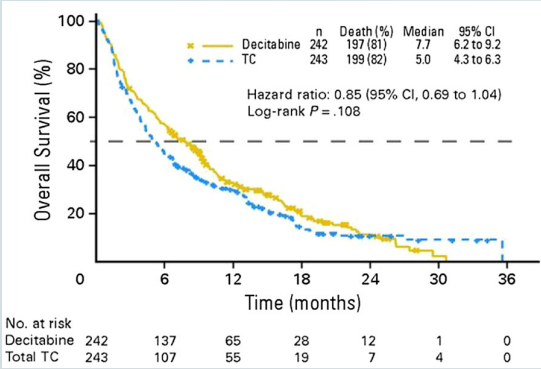

**Results of the trial were favorable for the group receiving decitabine**

Event-free survival:

**HR 0.75** (95% CI: 0.62-0.91)

Progression-free survival:

**HR 0.75** (95% CI: 0.62-0.91)

Clinical response

based on complete remission:

**OR 2.5** (95% CI: 1.40-4.78)

### • Real-world studies •

#### United States

Decitabine patient cohort (n=1109):

**median OS 8.2 months**

Most patients did not receive recommended minimum 4 cycles

#### Belgium

≥ 4 cycles of decitabine (n = 21):

**median OS 17.5 months**

< 4 cycles of decitabine (n = 24):  
median OS 1.6 months

#### Italy

Overall patient cohort (n = 306):

median OS 10.0 months

**Achieved CR (n = 71):  
median OS 22.1 months**

### Safety

- **Toxicity** associated with decitabine is relatively mild
- Adverse events are **manageable**
- **No additional adverse events** reported in real-world vs. clinical studies

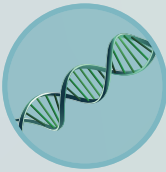

Treatment with decitabine may partly overcome the adverse prognostic impact of a **TP53 mutation**, but data are inconclusive

*While further studies are needed to identify AML patients likely to benefit from decitabine, clinical and real-world evidence clearly indicate survival improvements are possible among patients who face poor prognoses*

AML, acute myeloid leukemia; CR, complete remission; HR, hazard ratio; OR, odds ratio
